# Supplementary material
Source: PubMed Central journal article supplement (PMC6280795)
Supplement: EMBR-19-e45536-s001.pdf [file EMBR-19-e45536-s001.pdf]

## **Appendix Figures**

|                       |       |        |
|-----------------------|-------|--------|
| Appendix Figure S1    | ..... | Page 2 |
| Appendix Figure S2    | ..... | Page 2 |
| Appendix Figure S3    | ..... | Page 3 |
| Appendix Figure S4    | ..... | Page 4 |
| Appendix Figure S5    | ..... | Page 5 |
| Appendix Figure S6-i  | ..... | Page 6 |
| Appendix Figure S6-ii | ..... | Page 7 |
| Appendix Figure S7    | ..... | Page 8 |

## Appendix Figure S1

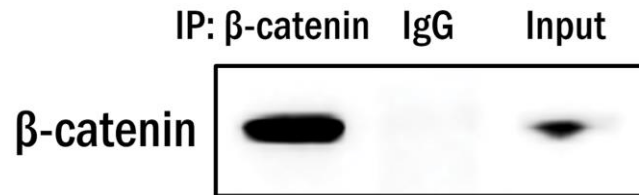

**Appendix Figure S1: Specificity of the  $\beta$ -catenin antibody used for affinity purification.** Representative  $\beta$ -catenin immunoprecipitation used for LC MS/MS analysis. Non-programmed rabbit IgG was used as a control.

## Appendix Figure S2

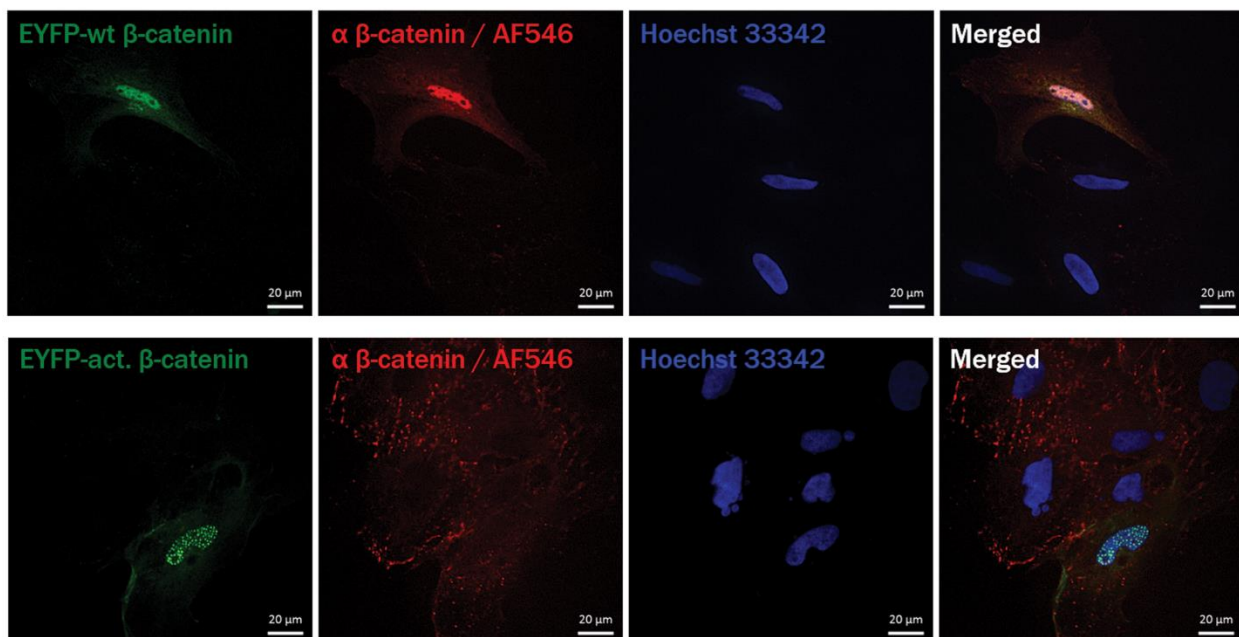

**Appendix Figure S2: Specificity of the  $\beta$ -catenin antibody used for immunofluorescence.** EYFP-wild-type- $\beta$ -catenin (Top panel, full length protein) or EYFP-activated- $\beta$ -catenin (Bottom panel, aa 1-89 removed) was ectopically expressed in A10 cells then fixed and staining using  $\beta$ -catenin primary antibody (recognizing an epitope in the region surrounding aa 37) and tetramethylrhodamine (TRITC, red) secondary antibody for immunofluorescent analysis. Hoechst 33342 was used for nuclear staining (blue).  $\beta$ -catenin antibody recognizes EYFP-wt  $\beta$ -catenin, but not EYFP-act.  $\beta$ -catenin, which is seen by comparing EYFP and TRITC signals, indicates the specificity of the antibody.

## Appendix Figure S3

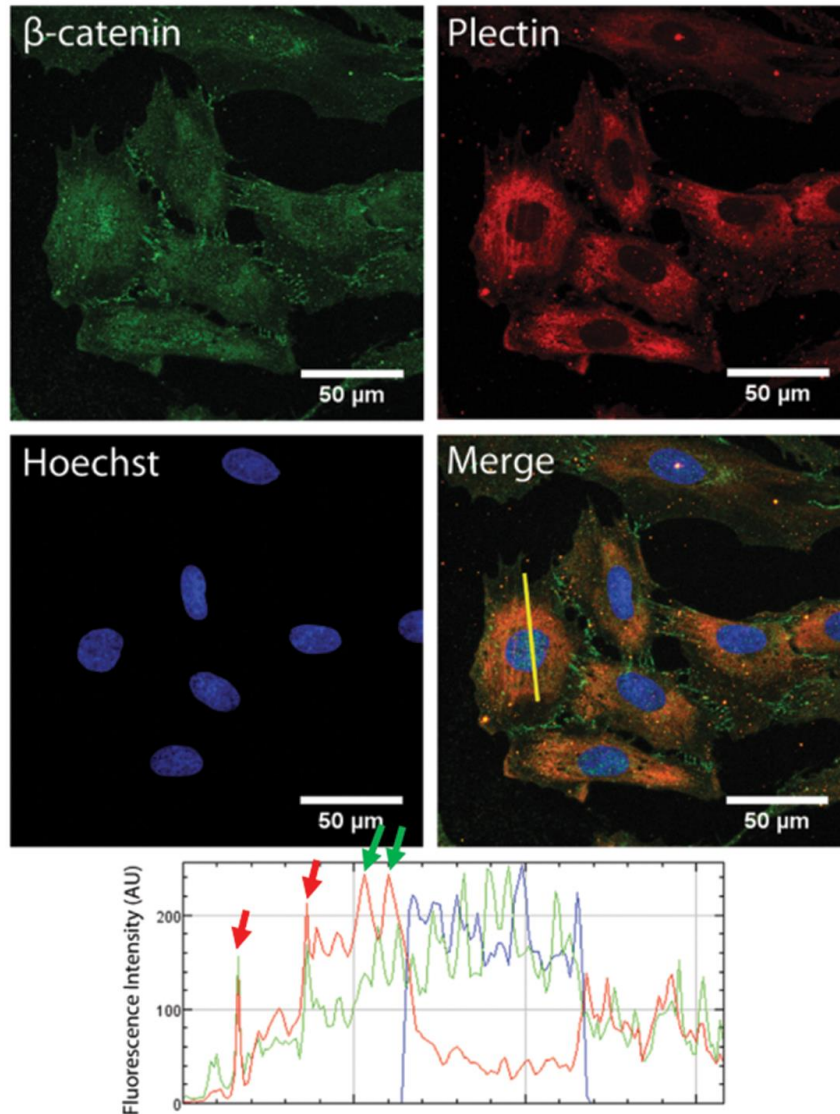

**Appendix Figure S3: Assessment of the co-localization of  $\beta$ -catenin and Plectin.** A10 cells were fixed and stained for  $\beta$ -catenin (green), Plectin (red), and nucleus (blue). Co-localization of these proteins was analysed by an RGB line scan. Green arrows indicate un-matched  $\beta$ -catenin and FMRP (green and red lines, respectively) and red arrows indicate matching peaks, demonstrating that the Plectin signal is independent of the  $\beta$ -catenin signal.

## Appendix Figure S4

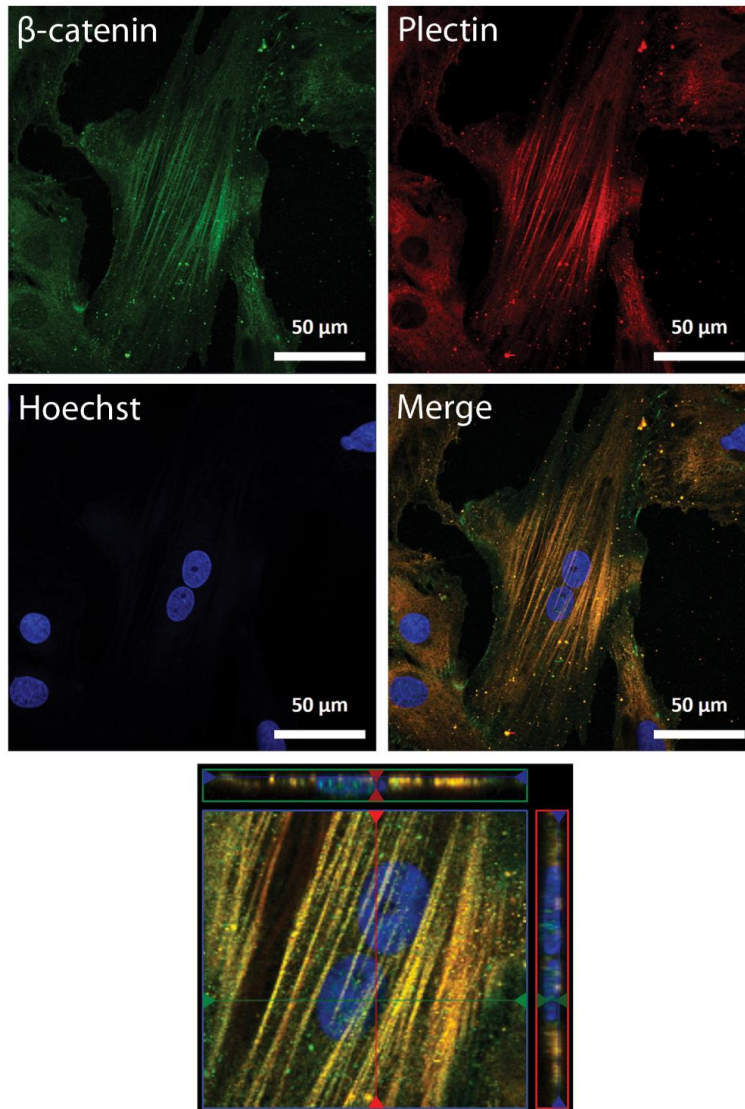

**Appendix Figure S4: Assessment of the co-localization of  $\beta$ -catenin and Plectin.** A10 cells were treated similarly to (S3) and a set of Z-stack images (240nm interval) was used to render orthogonal projection images. Yellow colour indicates co-localization of Plectin and  $\beta$ -catenin.

# Appendix Figure S5

## GBP-Lifeact

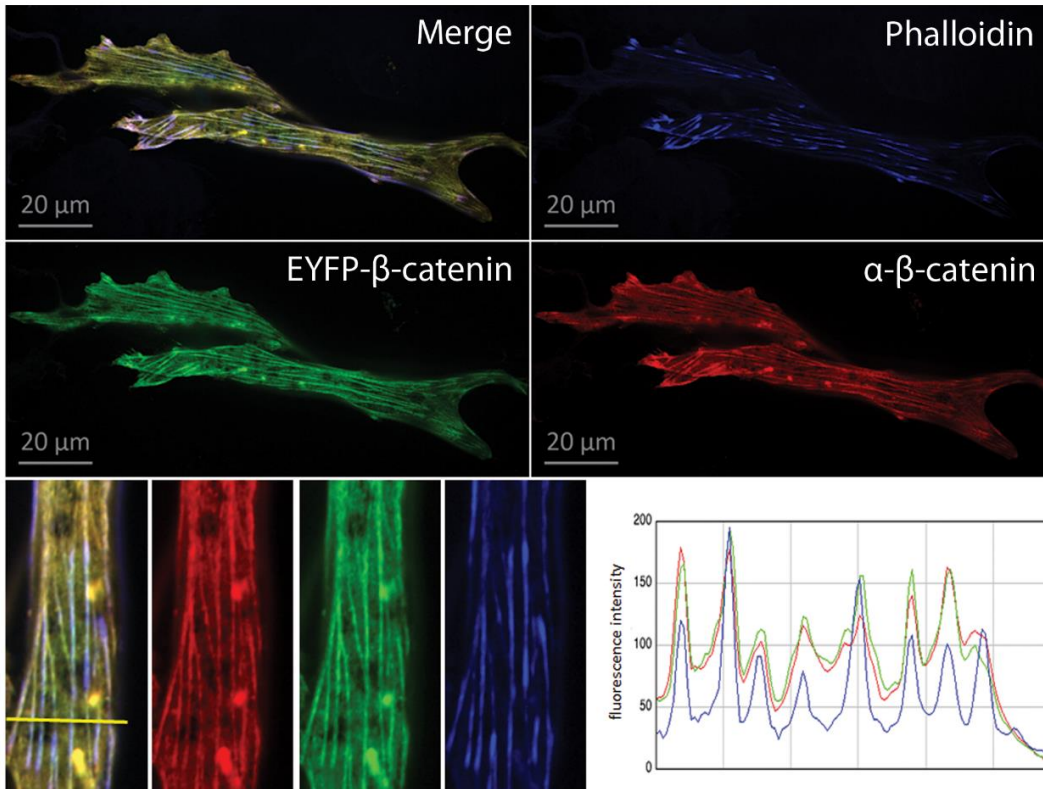

**Appendix Figure S5: Specific changes in  $\beta$ -catenin localization by GBP-Lifeact.** C2C12 myoblasts were transfected with GBP-Lifeact and EYFP- $\beta$ -catenin and subjected to fluorescent and immunofluorescent analysis, as indicated. The matching peaks of the line scanned RGB signals from F-actin (blue), EYFP- $\beta$ -catenin (green), and  $\beta$ -catenin (red) demonstrates robust recruitment of EYFP-fusion protein by anchored GBP on the F-actin.



# Appendix Figure S6

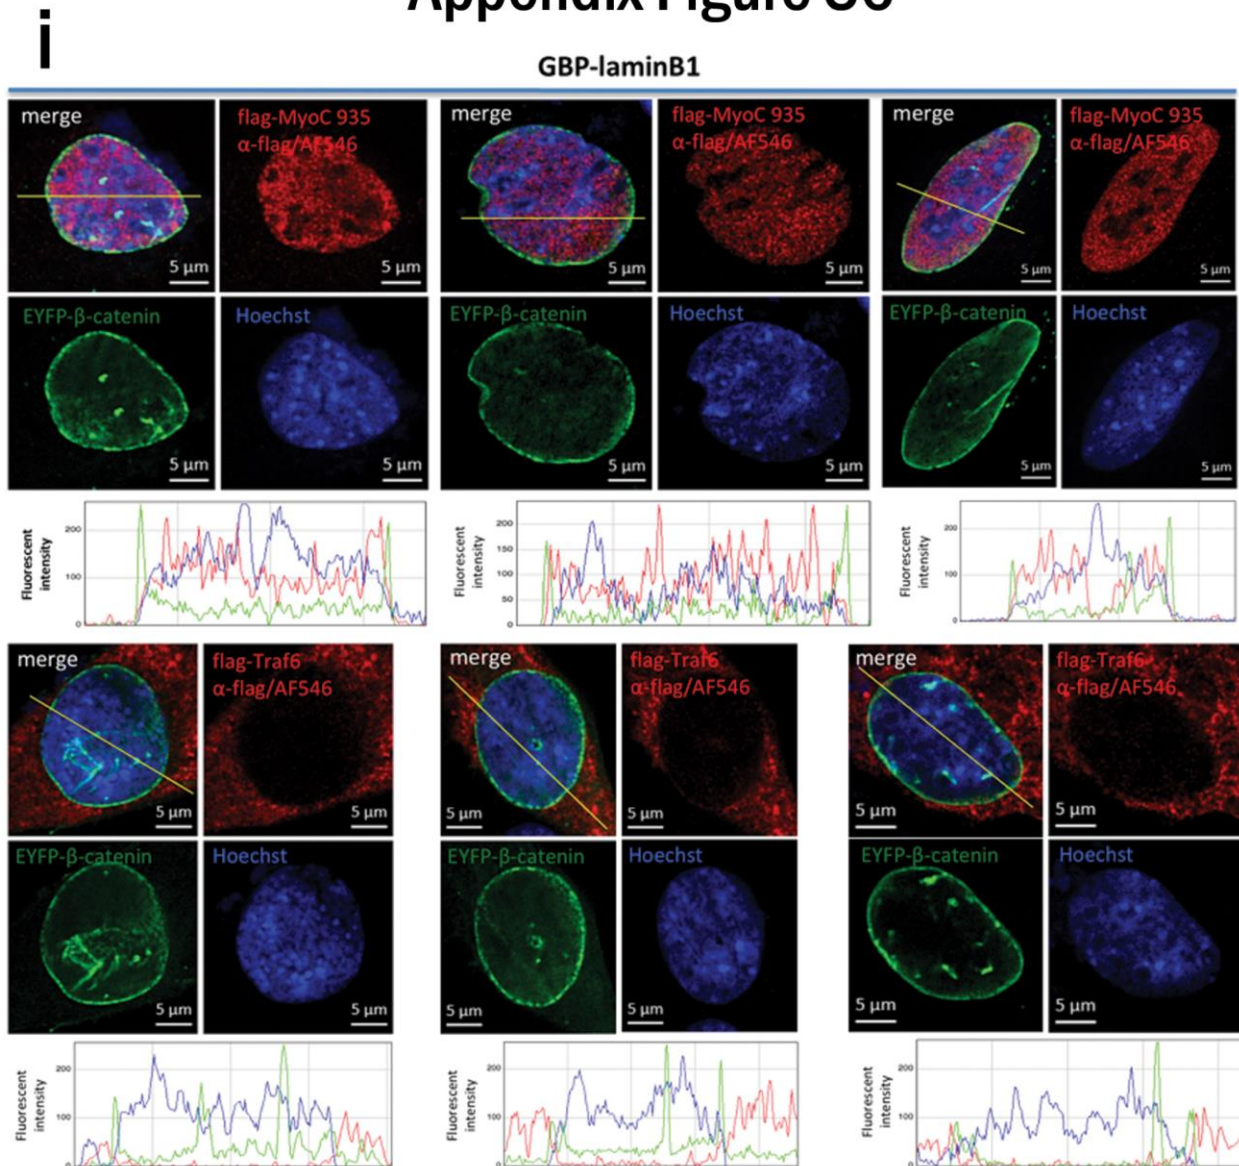

**Appendix Figure S6-i: Flag peptide does not interact with neither GBP, EYFP, nor  $\beta$ -catenin.** EYFP- $\beta$ -catenin was co-expressed with Flag-Myocardin 935 (MyoC 935) or Flag-Traf6 with (i) GBP-Lamin B1. The transfected cells were subjected to immunofluorescence analysis with a Flag antibody (AF546, red) and the nucleus was visualized by DNA staining with Hoechst 33342. The micrograph shows EYFP- $\beta$ -catenin (green) was trapped at anchor sites (nuclear envelope with GBP-Lamin B1 or F-actin with Lifeact-GBP, respectively). Flag-MyoC 935 and Flag-Traf6 were localized at the expected sub-cellular location such as the nucleus for MyoC 935 and cytosol for Traf6. Line scanning of the RGB shows no enrichment of the red signal on either green signal peaks.

# Appendix Figure S6

ii

Lifeact-GBP

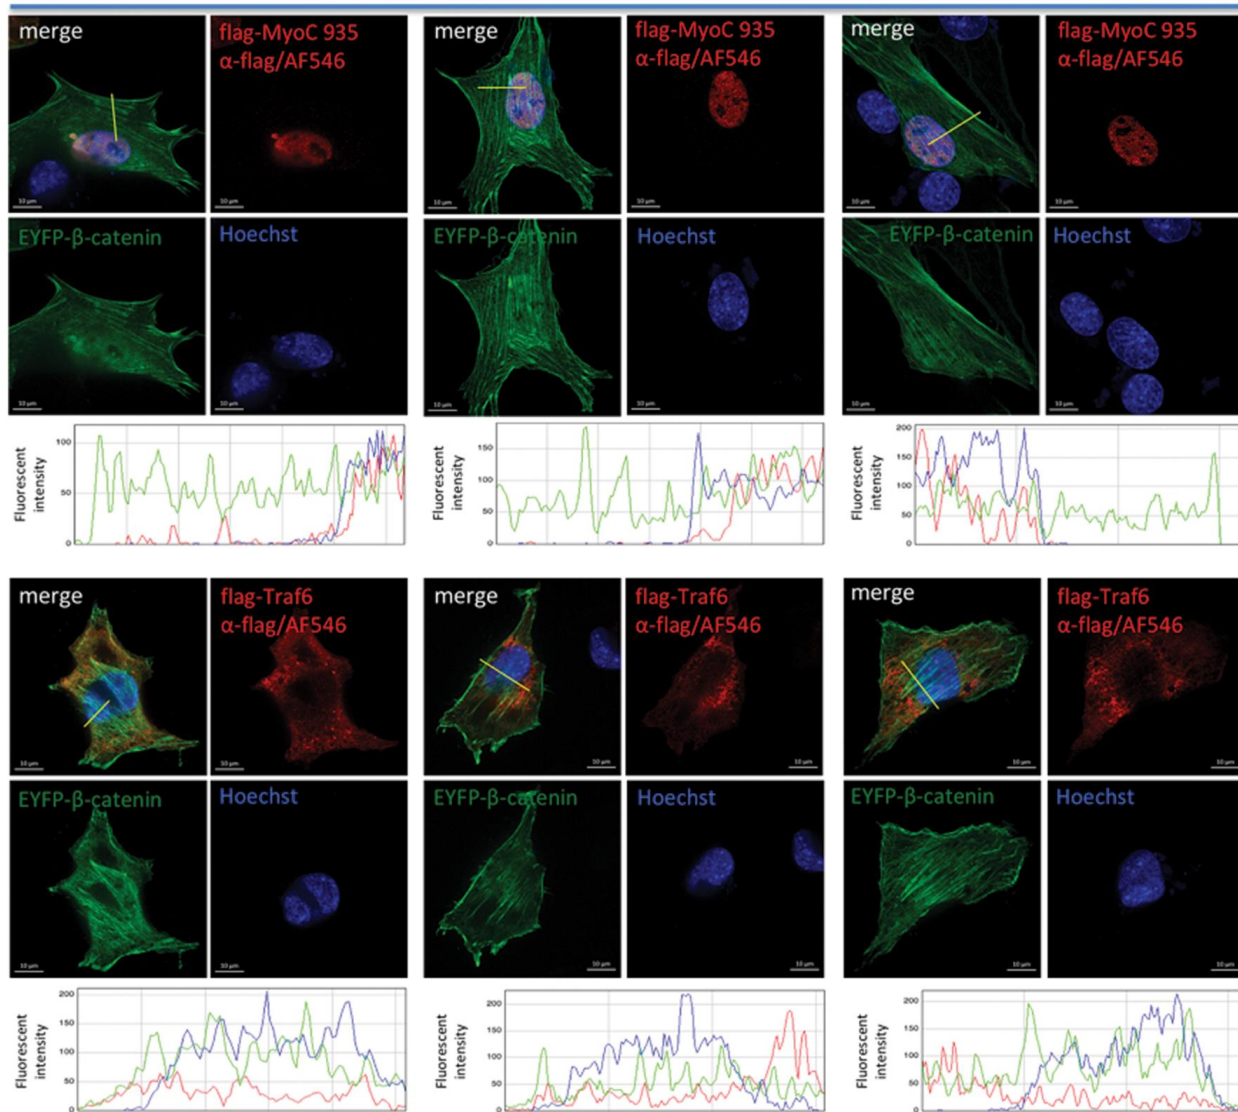

**Appendix Figure S6-ii: Flag peptide does not interact with neither GBP, EYFP, nor β-catenin.** EYFP-β-catenin was co-expressed with Flag-Myocardin 935 (MyoC 935) or Flag-Traf6 with (ii) GBP-Lifeact. The transfected cells were subjected to immunofluorescence analysis with a Flag antibody (AF546, red) and the nucleus was visualized by DNA staining with Hoechst 33342. The micrograph shows EYFP-β-catenin (green) was trapped at anchor sites (nuclear envelope with GBP-Lamin B1 or F-actin with Lifeact-GBP, respectively). Flag-MyoC 935 and Flag-Traf6 were localized at the expected sub-cellular location such as the nucleus for MyoC 935 and cytosol for Traf6. Line scanning of the RGB shows no enrichment of the red signal on either green signal peaks.

## Appendix Figure S7

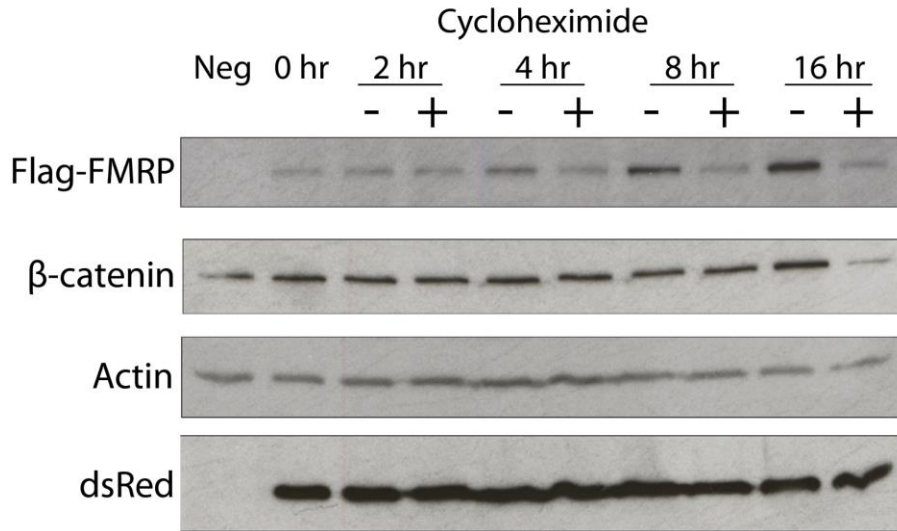

**Appendix Figure S7: Determination of the conditions for translational inhibition by cycloheximide.** A10 cells were transfected with Flag-FMRP and treated with cycloheximide (50 ng/ $\mu$ L) or its solvent (DMSO) for the indicated times and subjected to Western blot analysis for expression levels of indicated proteins. Actin was used as a loading control, and dsRed as an indicator for transfection efficiency.
